# Supplementary material
Source: PubMed Central journal article supplement (PMC6650729)
Supplement: baADV2019000445-suppl1.pdf [file baADV2019000445-suppl1.pdf]

### Supplemental Figure 1: Relapse-specific *TP53* mutations and chromosome 17p deletions.

(A-D left) Mutation variant allele and donor chimerism percentage determined from serial targeted sequencing. Pre-transplant-specific mutations in orange, relapse-specific mutations in green, and mutations identified at both timepoints in blue. (B-D right) CGH microarray analysis of chromosome 17. (E) *TP53* alterations detected pre-transplant and at post-transplant relapse.

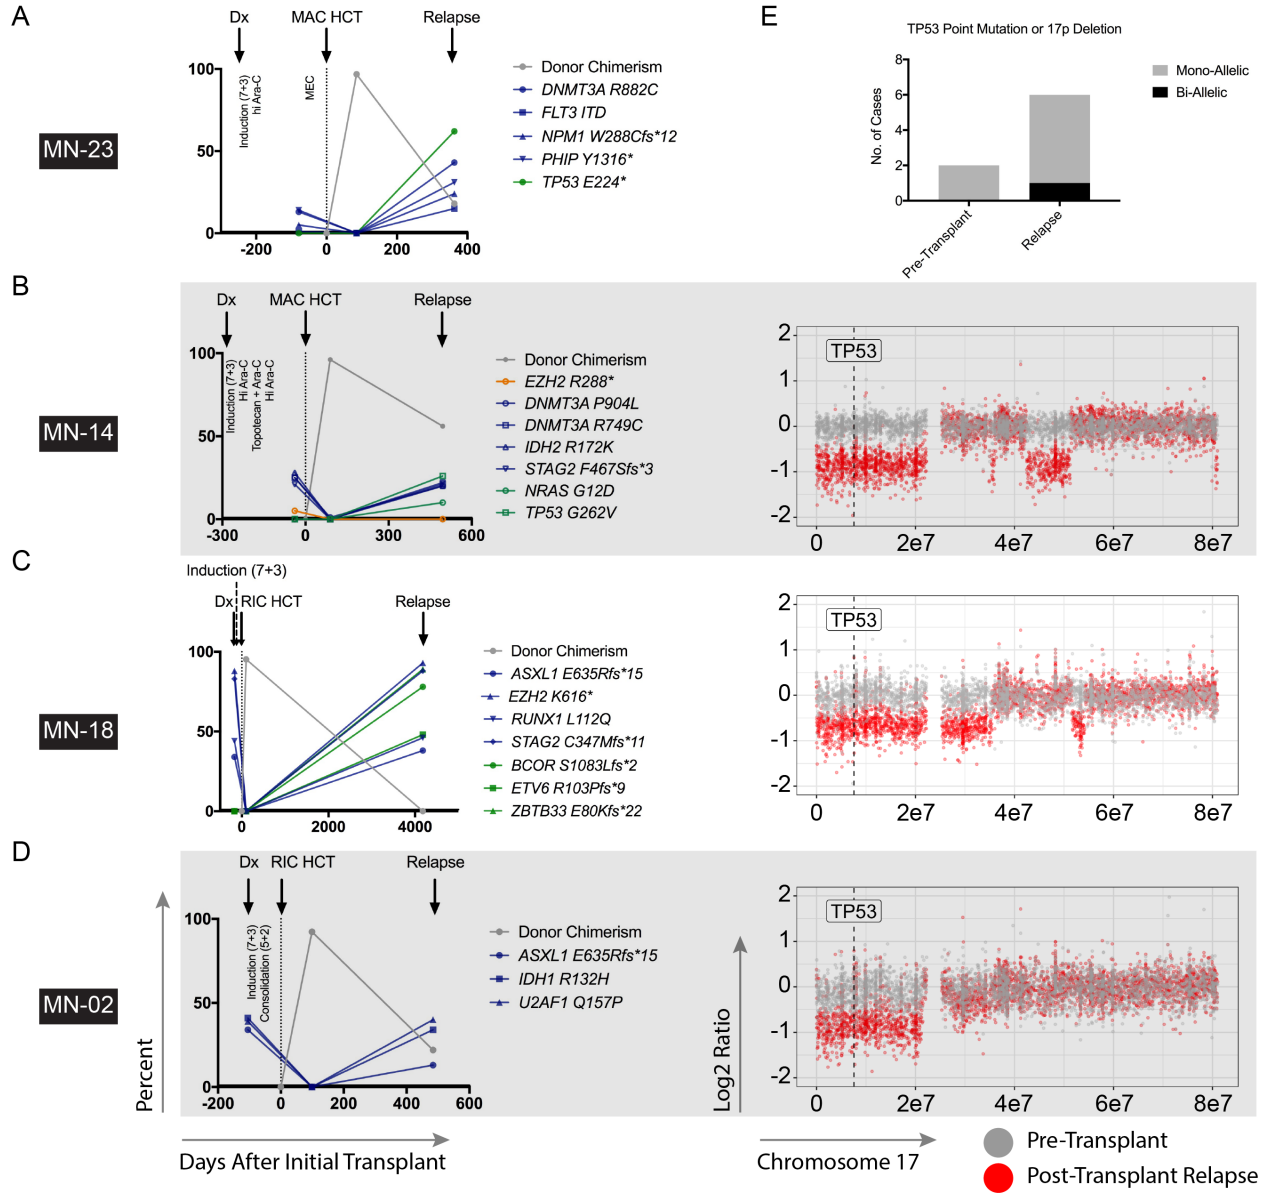

## Supplemental Figure 2: 6p copy neutral loss of heterozygosity at post-transplantation relapse.

Copy number and SNP microarray analysis of chromosome 6 in pre-transplant and post-transplant relapse tumor samples from case MN-04 presented from Agilent Cytogenomics software analysis. Copy number is presented in the upper panel. SNP uncut allele number is presented in the lower panel.

### Pre-Transplant

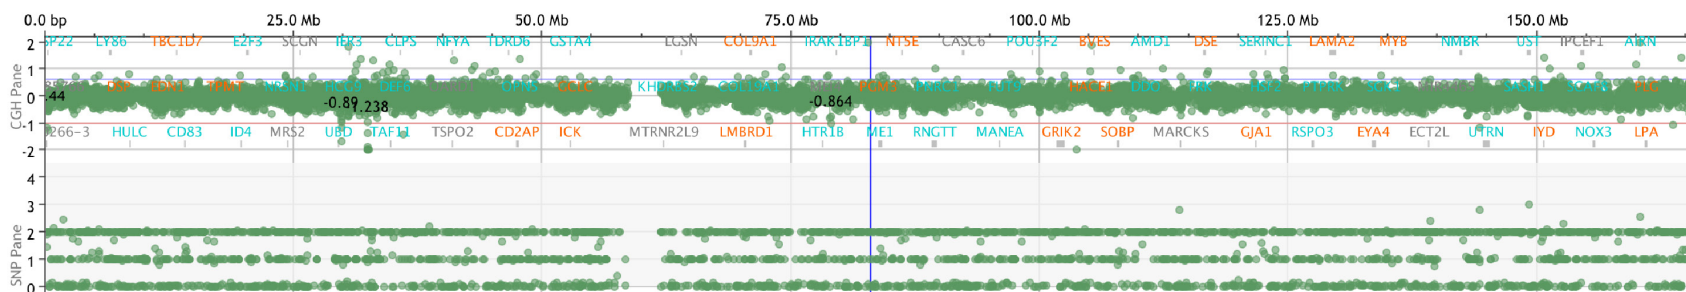

### Post-Transplant Relapse

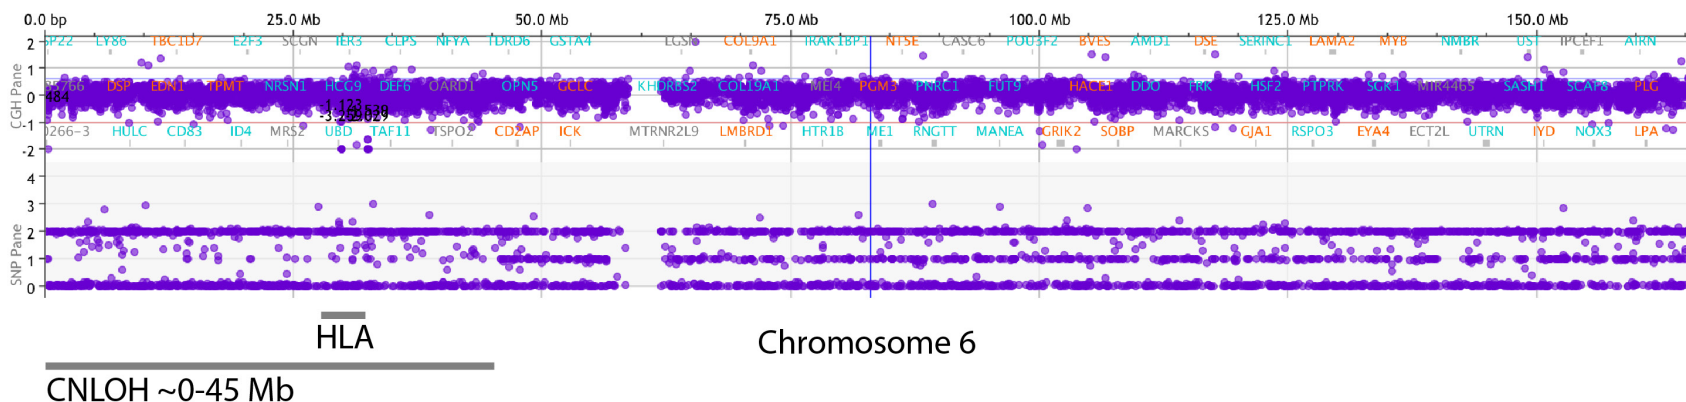

**Supplemental Figure 3: Relationship between genome-wide copy number variation, HLA loss, and *TP53* status.**

The genomic span of autosomal copy number variations (CNV) identified by CGH+SNP microarray were plotted as matched pre-transplant and post-transplant relapse specimens (A) and as the change in genomic span from pre-transplant to post-transplant relapse (B). The genomic span of autosomal CNV was greater in relapse versus pre-transplant ( $p = 0.01$ , two-tailed Student's t-test). The change in genomic span of autosomal CNV did not significantly vary between HLA loss and non-HLA loss cases ( $p = 0.36$ , two-tailed Student's t-test).

A

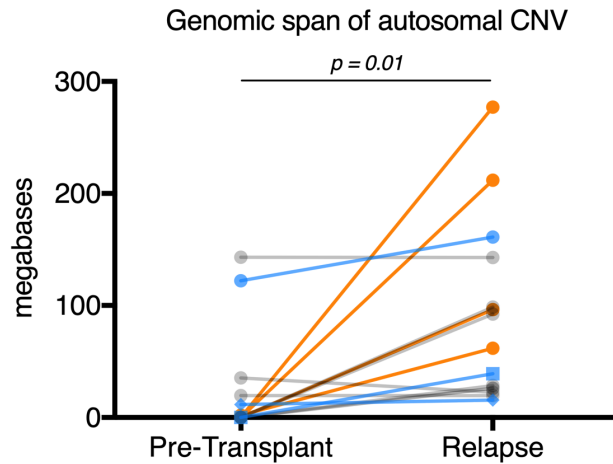

B

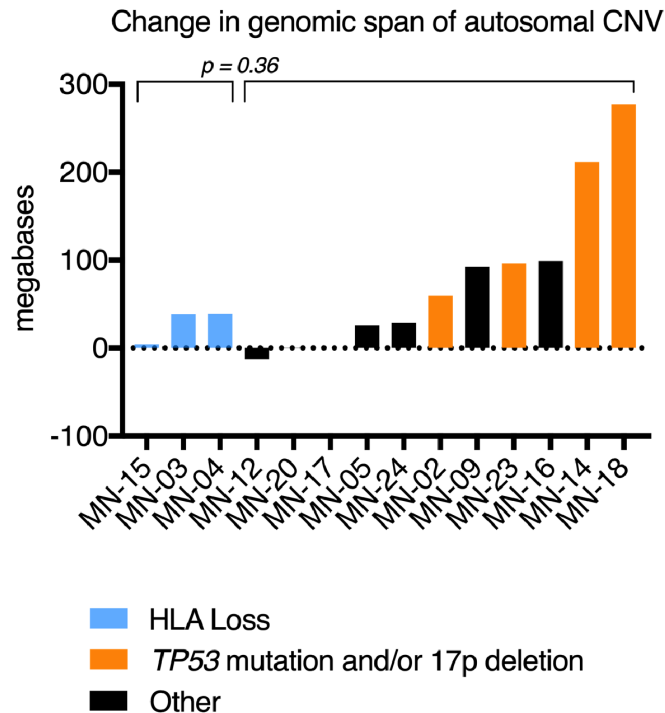

**Supplemental Table 1:** Clinical characteristics of patients included in this study.

**Supplemental Table 2:** Genes targeted for capture and sequencing.

**Supplemental Table 3:** Criteria for variant evaluation among genes recurrently mutated in myeloid malignancies.

**Supplemental Table 4:** Class I HLA typing by targeted sequencing analysis, clinical HLA typing, and amplicon next-generation sequence-based HLA typing of class I and class II HLA alleles.

**Supplemental Table 5:** Single nucleotide variant and insertion/deletion variants detected via targeted capture sequencing.

**Supplemental Table 6:** Copy number variants identified by CGH+SNP microarray analysis and summary of clinical cytogenetic analysis.
